# Supplementary material for: LC-MS/MS methodology development and validation for the screening and quantification of five antibiotics in water
Source: Royal Society of Chemistry journal article supplement (doi:10.1039/d1ay01754c), 2022-01-01
Supplement: d1ay01754c1.pdf [file d1ay01754c1.pdf]

## AMX

Cal9-4\_100ppb

01/25/19 16:32:59

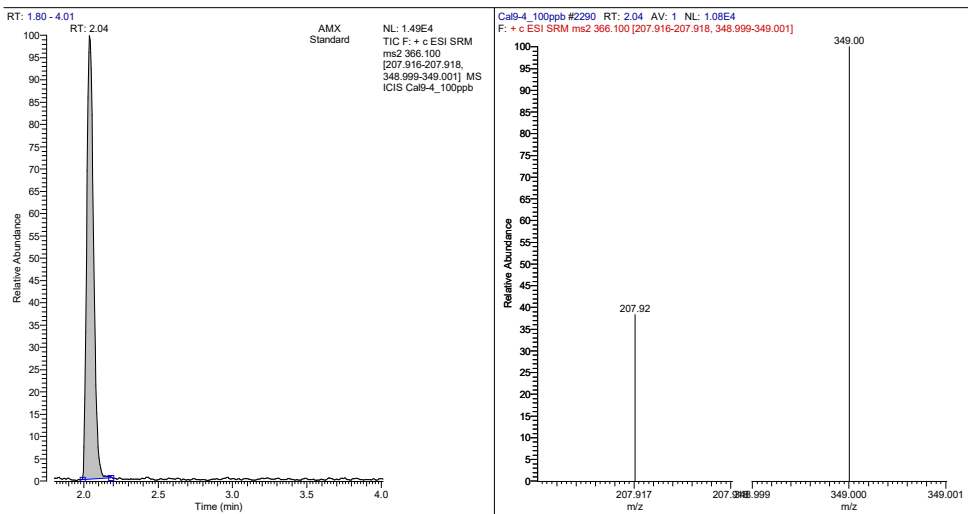

100\_ppb-pH4-3

01/30/19 19:27:56

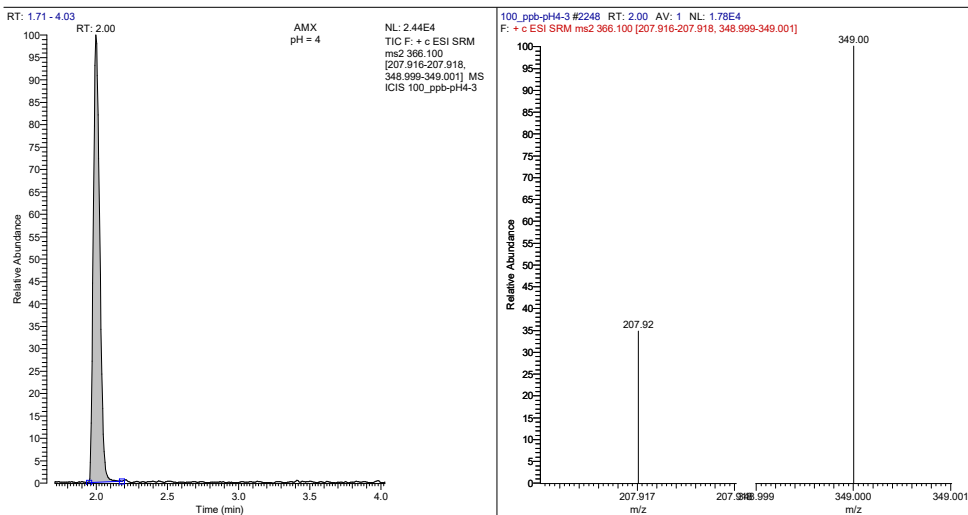

100\_ppb-pH8-2

01/31/19 04:36:25

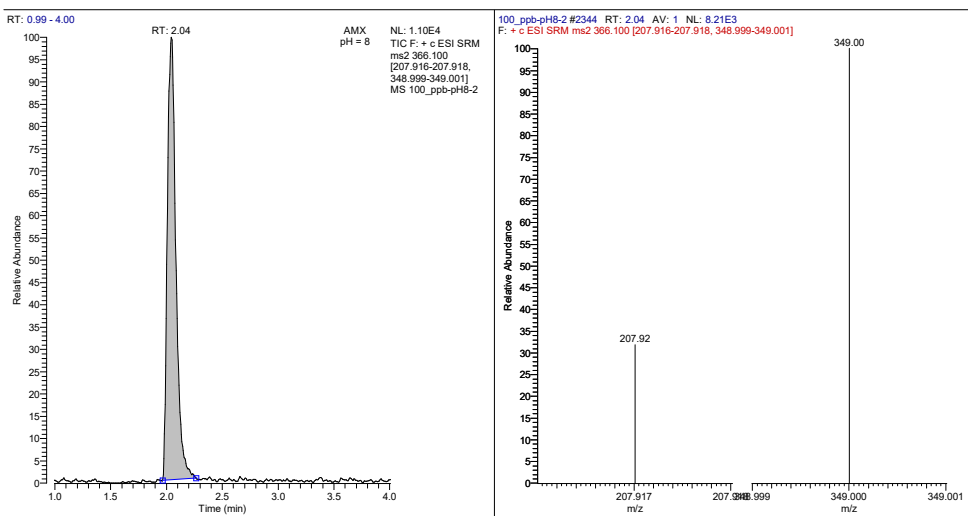

**Figure S1.** LC ion chromatograms and Mass spectra fragmentation pattern for AMX analyte at 100 mg/mL in water, pH = 4 and pH = 8 spiked standard samples.

# AMP

Cal9-4\_100ppb

01/25/19 16:32:59

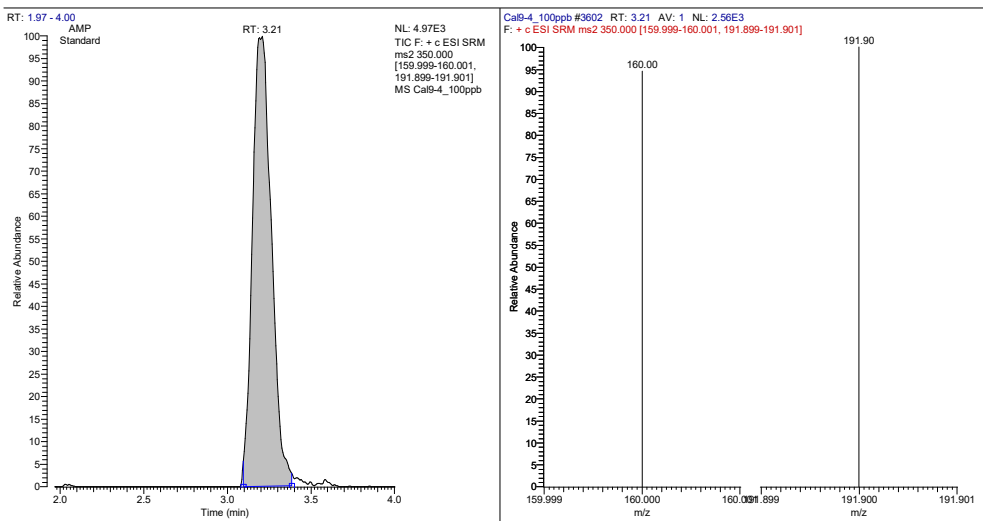

100\_ppb-pH4-3

01/30/19 19:27:56

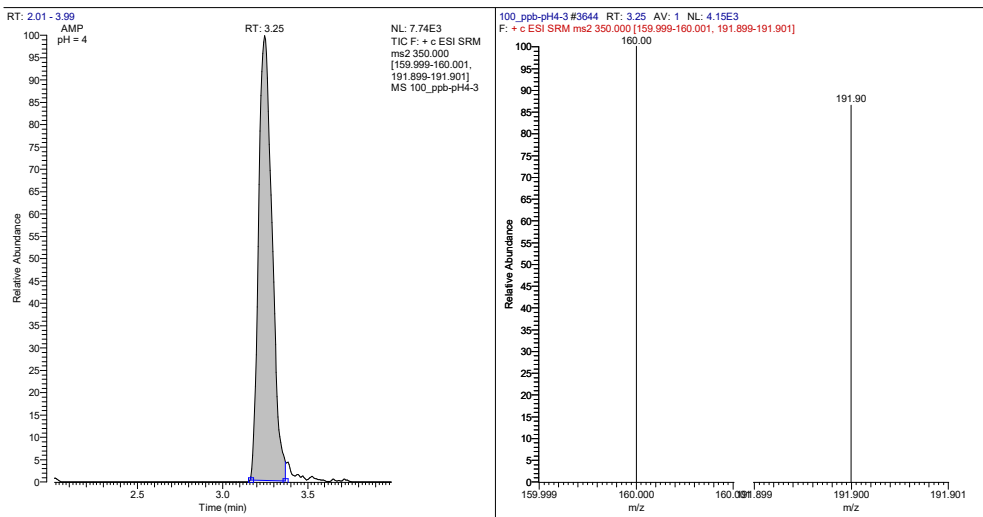

100\_ppb-pH8-2

01/31/19 04:36:25

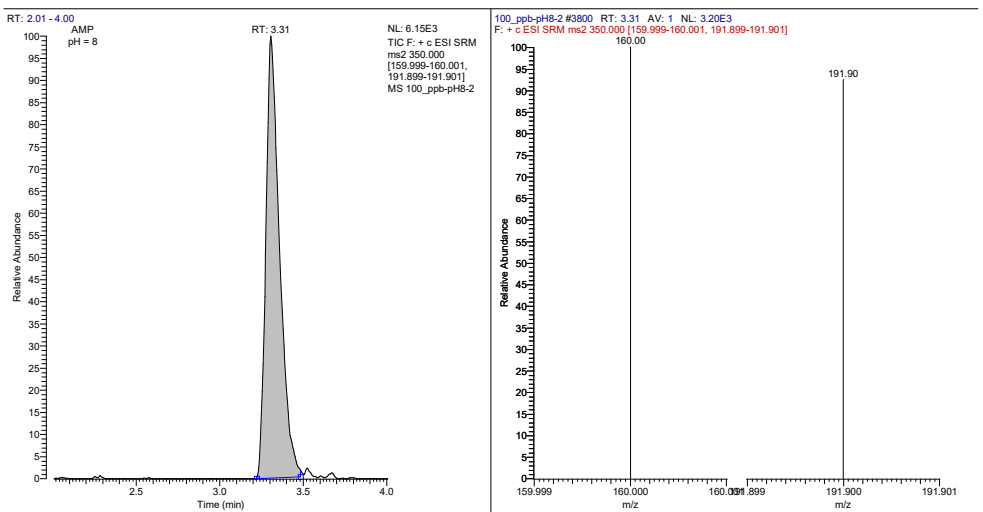

Figure S1 cont. LC ion chromatograms and Mass spectra fragmentation pattern for AMP analyte at 100 mg/mL in water, pH = 4 and pH = 8 spiked standard samples.

# OTC

Cal9-4\_100ppb

01/25/19 16:32:59

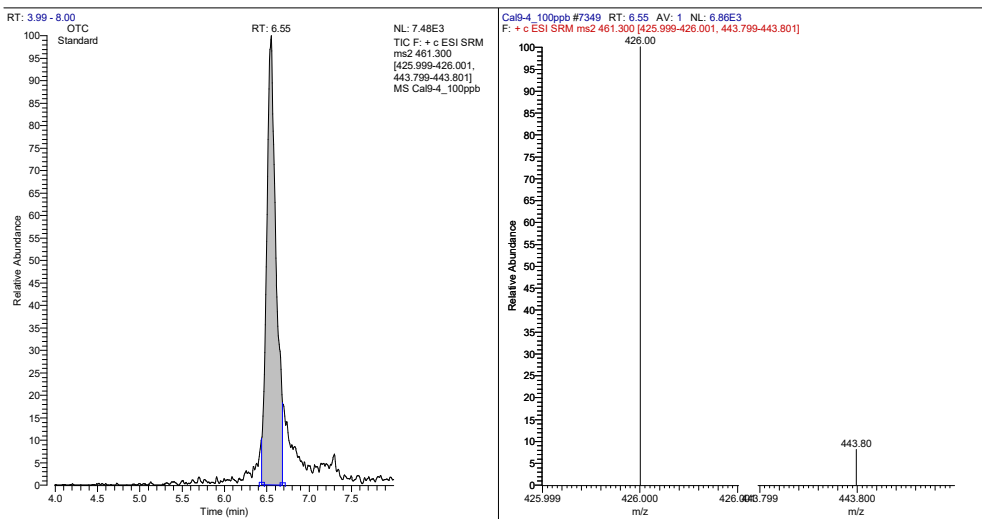

100\_ppb-pH4-3

01/30/19 19:27:56

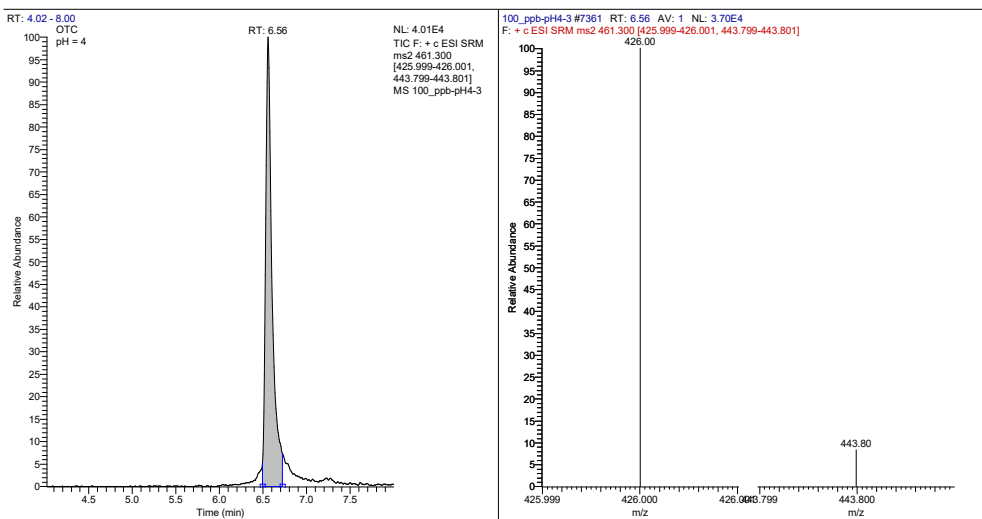

100\_ppb-pH8-2

01/31/19 04:36:25

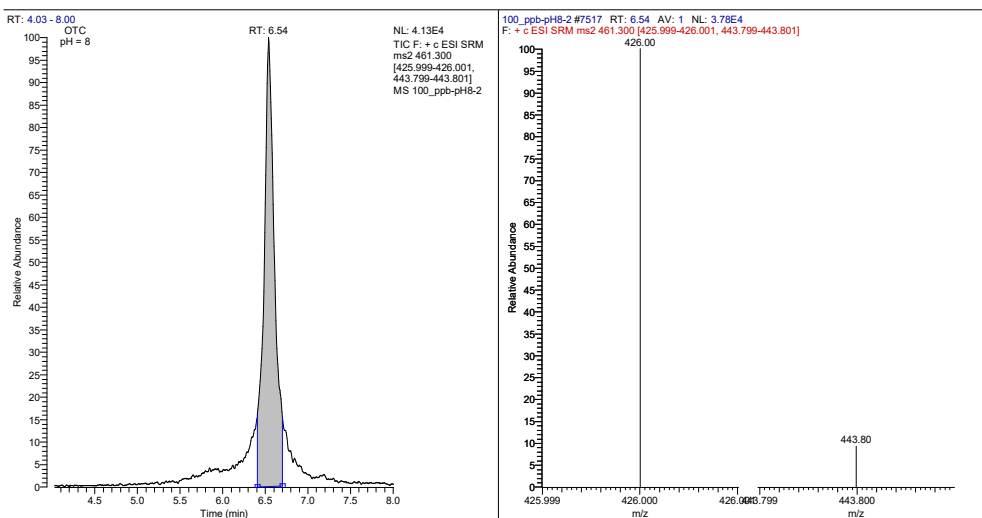

Figure S1 cont. LC ion chromatograms and Mass spectra fragmentation pattern for OTC analyte at 100 mg/mL in water, pH = 4 and pH = 8 spiked standard samples.

# ENR

Cal9-4\_100ppb

01/25/19 16:32:59

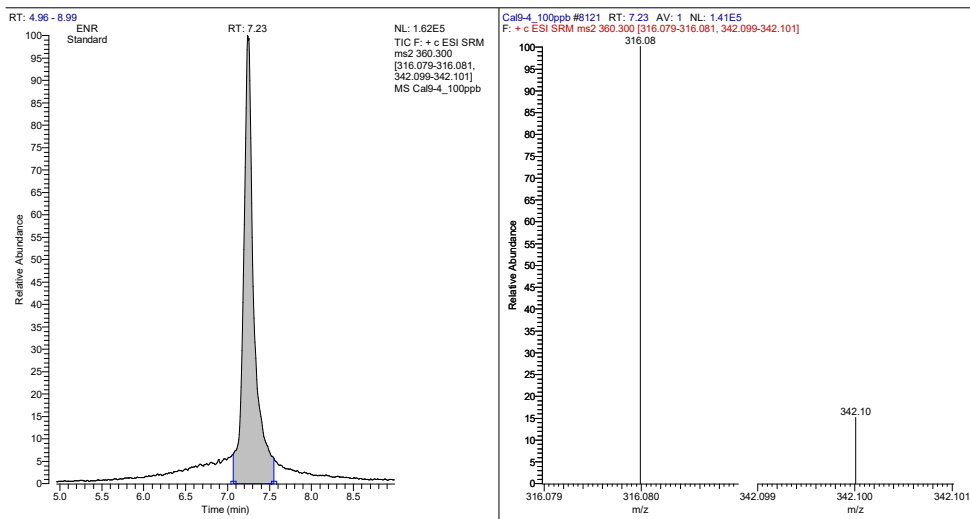

100\_ppb-pH4-3

01/30/19 19:27:56

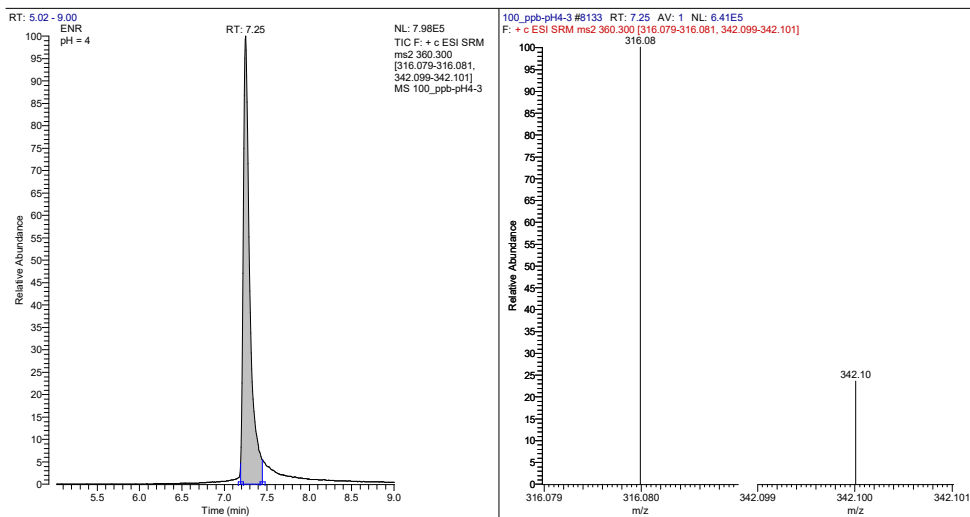

100\_ppb-pH8-2

01/31/19 04:36:25

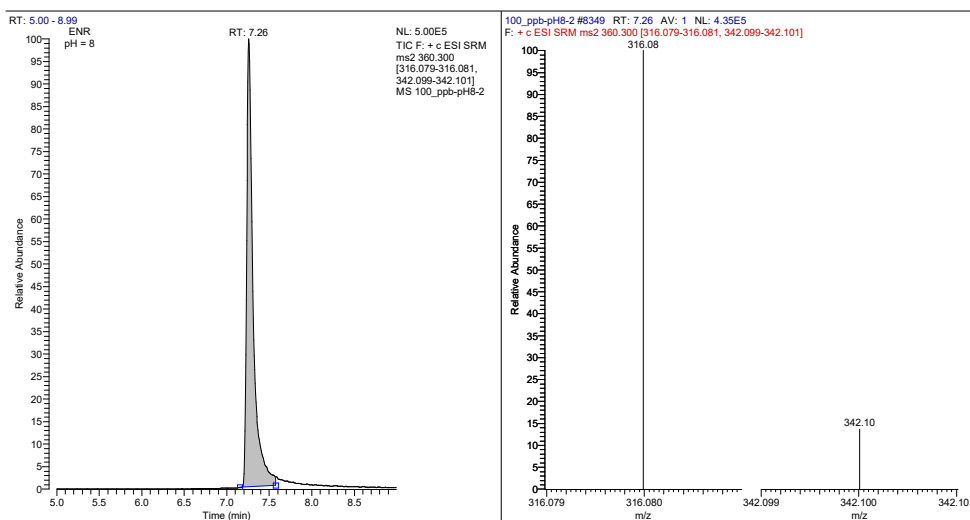

**Figure S1 cont.** LC ion chromatograms and Mass spectra fragmentation pattern for ENR analyte at 100 mg/mL in water, pH = 4 and pH = 8 spiked standard samples.

# CHL

Cal9-4\_100ppb

01/25/19 16:32:59

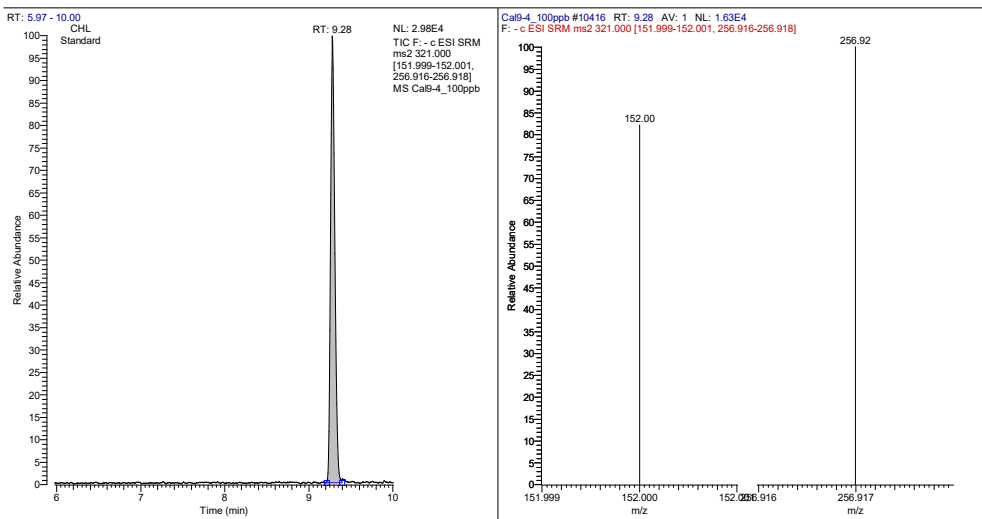

100\_ppb-pH4-3

01/30/19 19:27:56

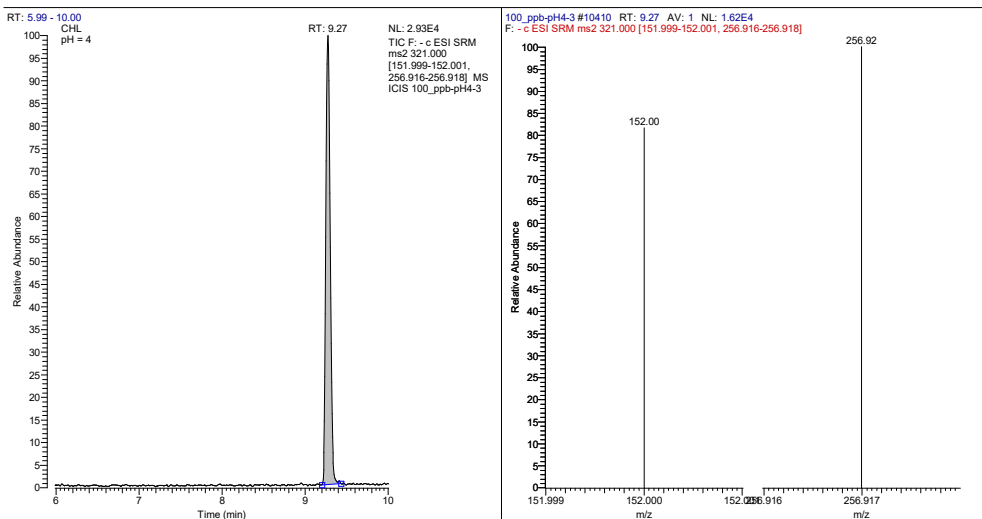

100\_ppb-pH8-2

01/31/19 04:36:25

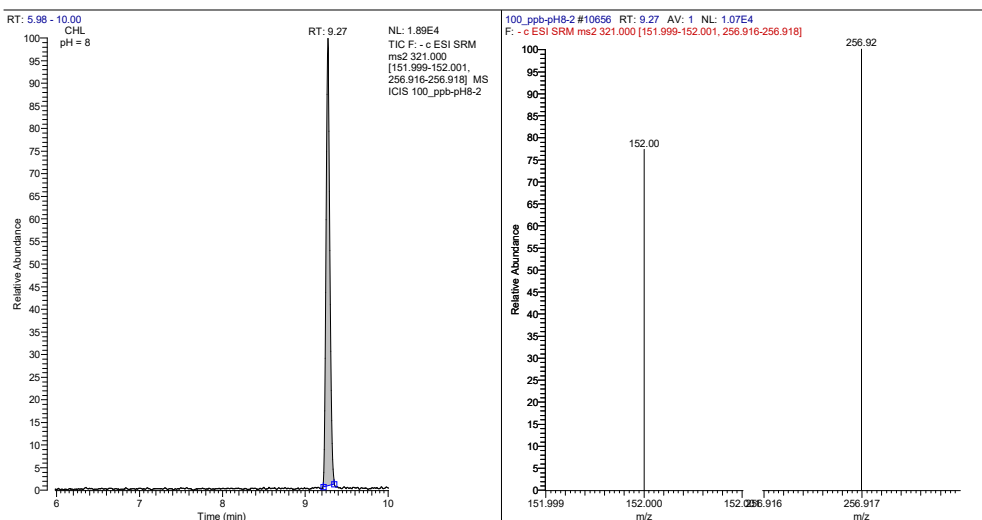

Figure S1 cont. LC ion chromatograms and Mass spectra fragmentation pattern for CHL analyte at 100 mg/mL in water, pH = 4 and pH = 8 spiked standard samples.

# SMX – Internal Standard

Cal9-4\_100ppb

01/25/19 16:32:59

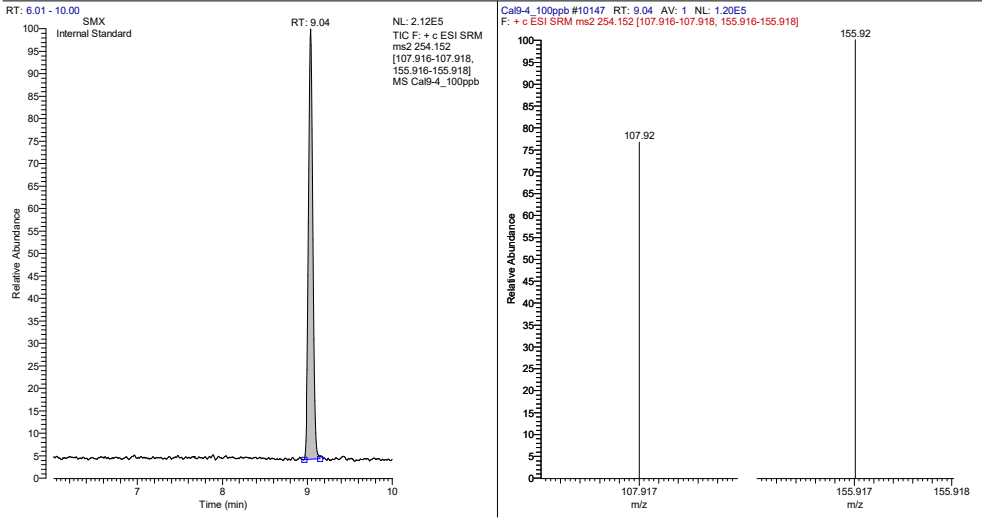

100\_ppb-pH4-3

01/30/19 19:27:56

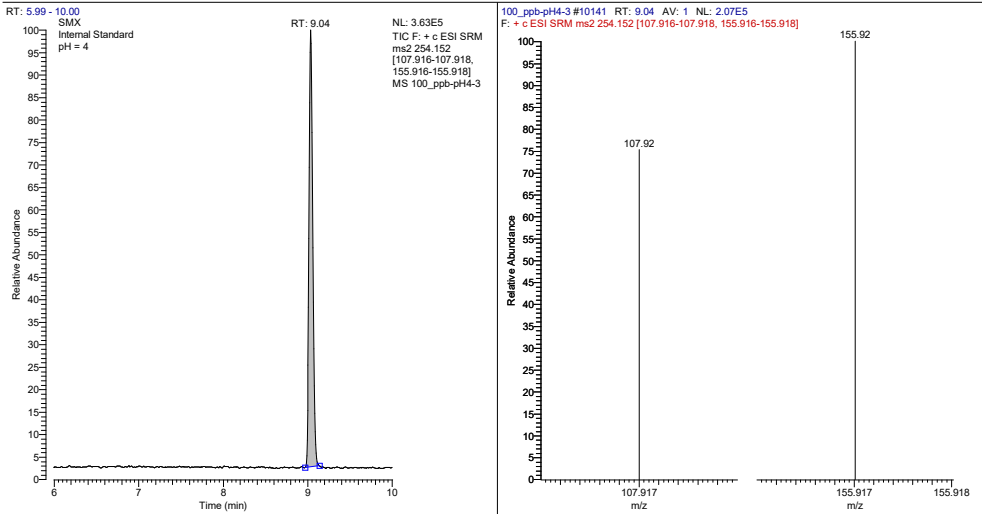

100\_ppb-SPE-8-4-1-pH8-1

01/31/19 09:42:47

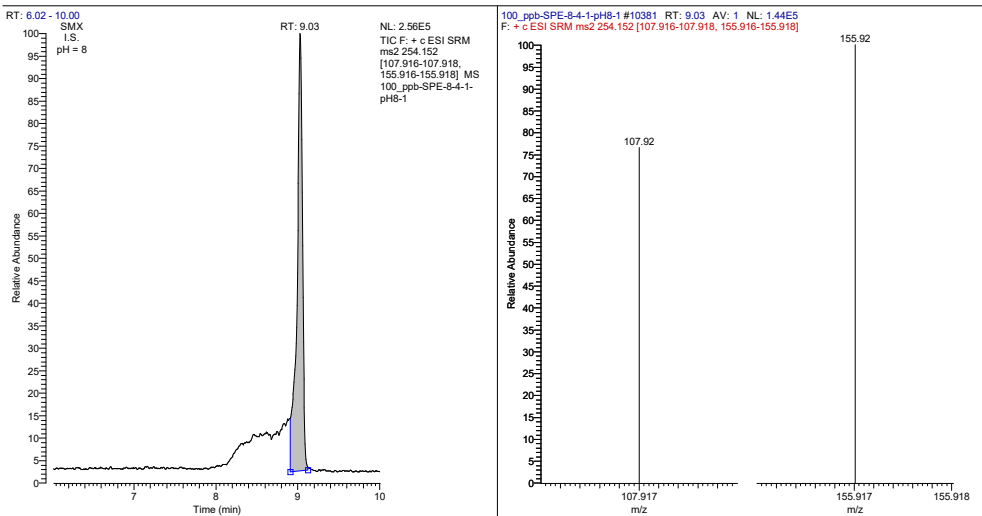

**Figure S1 cont.** LC ion chromatograms and Mass spectra fragmentation pattern for SMX-IS at 100 mg/mL in water, pH = 4 and pH = 8 spiked standard samples.
